# Supplementary material for: Self-assembling peptide nanomaterials co-engineered with linoleic acid and catechol motifs for synergistic ferroptosis–photothermal therapy–chemotherapy
Source: Royal Society of Chemistry journal article supplement (doi:10.1039/d5tb00700c), 2025-01-01

In the manuscript, the unsaturated double bonds in the linoleic acid molecule were inadvertently depicted in the trans-conformation in Scheme 1, Figure S1, Figure S3, and Figure S5. However, these bonds naturally adopt a cis-conformation. We have therefore corrected the molecular structure in both the revised manuscript and the supporting information, specifically in Scheme 1, Figure S1, Figure S3, and Figure S5, to accurately reflect the proper configuration.

### Revised Scheme 1:

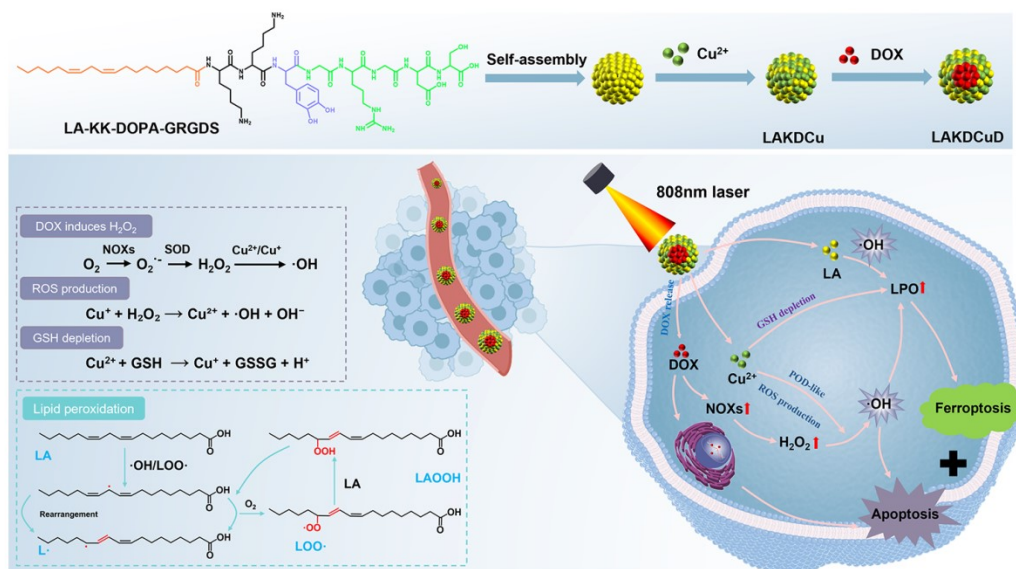

### Revised Fig.S1:

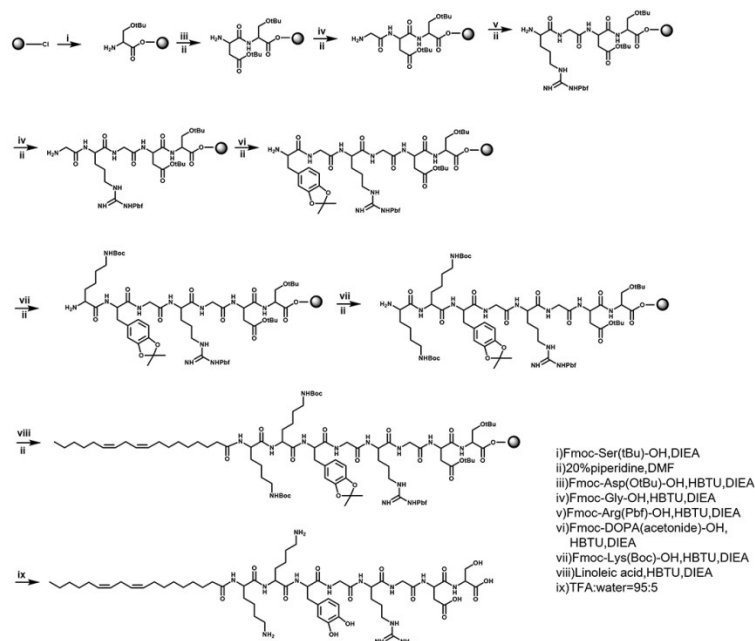

Revised Fig. S3:

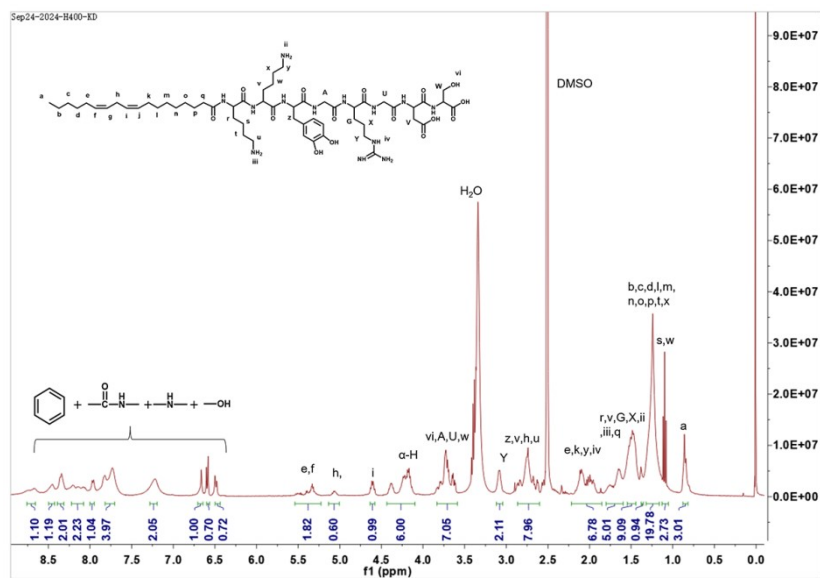

Revised Fig. S5:

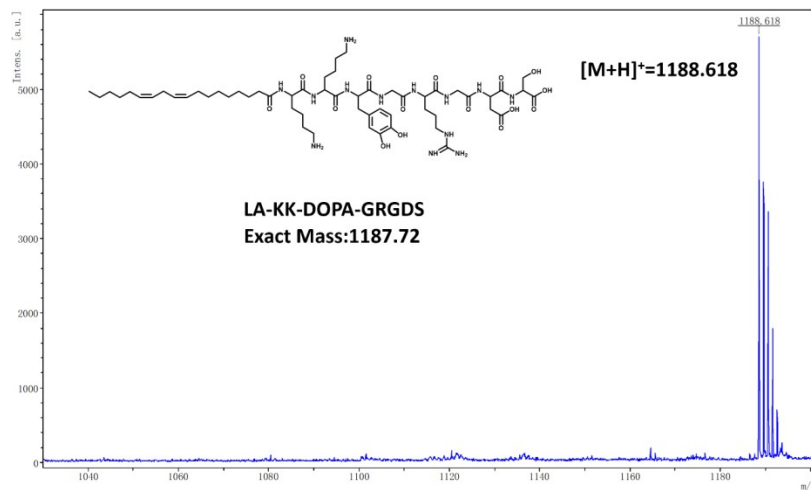

Supplement: d5tb00700c1.pdf [file d5tb00700c1.pdf]
